# Supplementary material
Source: publisher figshare collection journal article supplement (https://gsapubs.figshare.com/ndownloader/files/22757681)
Supplement: Supplementary file 1 [file 22757681]

## APPENDIX

For the early AHe analyses (samples with no determination of Sm content in Table 1) protocols followed laboratory routines for resistance furnace heating He extraction from multiple grains (Farley, 2000). Only clear and euhedral grains with average grain radii in a close size range were selected. Grains were then immersed in ethanol and checked under polarised light to detect possible mineral inclusions. Samples were loaded into stainless steel capsules after grain characteristics had been imaged, measured and recorded. Grains were then outgassed at  $\sim 870^{\circ}\text{C}$  for 20 minutes, spiked with  $^3\text{He}$  and the gas volume determined using a Balzers quadrupole mass spectrometer. A hot blank was run after each sample to verify complete outgassing of the apatites. Following outgassing, samples were removed from their capsules and sent to the former CSIRO, North Ryde, Sydney laboratory for analysis. They were dissolved in  $\text{HNO}_3$  and spiked with mixed Laser Spike (15 ppb  $^{235}\text{U}$  and 15 ppb  $^{230}\text{Th}$ ). U and Th contents were then determined at the University of Technology, Sydney with a Perkin Elmer Sciex 5000a ICP-MS using the isotope ratio application. Standards used contained 25  $\mu\text{l}$  of Laser JM mixed standard, i.e.  $^{238}\text{U}$  Johnson Matthey (0.25 ppm) and  $^{232}\text{Th}$  Johnson Matthey (0.25 ppm) with spike addition. Ages were calculated using the approach described by Farley et al. (1996). Analytical protocols for later AHe analyses (for samples showing Sm content in Table 1) followed an established laboratory routine for laser He extraction from single to a few grains (House et al. 2000). Samples were loaded into platinum capsules and outgassed under vacuum at  $\sim 900^{\circ}\text{C}$  for 5 minutes, using a fibre-optically coupled diode laser with a 820 nm wavelength, spiked with  $^3\text{He}$  and gas volumes were determined using a Balzers quadrupole mass spectrometer. U-Th-Sm data used in the age calculations were acquired via total dissolution of outgassed apatite in  $\text{HNO}_3$  and analysed using a recently released Varian quadrupole ICP-MS housed in the School of Earth Sciences, University of Melbourne.

All apparent (U-Th)/He ages were calculated and corrected for  $\alpha$ -emission following the approach of Farley et al. (1996). Analytical uncertainties for the University of Melbourne (U-Th)/He facility are assessed to be  $\sim 6.2\%$  ( $\pm 1\sigma$ ), which incorporates the  $\alpha$ -correction-related constituent and takes into account an estimated 5  $\mu\text{m}$  uncertainty in grain size measurements, gas analysis and ICP-MS uncertainties. Durango apatite standard was run as an internal standard with each batch of samples analysed and served as a check on analytical accuracy.

## References

- <jrn>Farley, K.A., 2000, Helium diffusion from apatite: General behavior as illustrated by Durango apatite: *Journal of Geophysical Research*, v. 105, p. 2903–2914, doi: 10.1029/1999JB900348.</jrn>
- <jrn>Farley, K.A., Wolf, R.A., and Silver, L.T., 1996, The effects of long alpha-stopping distances on (U-Th)/He ages: *Geochimica et Cosmochimica Acta*, v. 60, p. 4223–4229, doi: 10.1016/S0016-7037(96)00193-7.</jrn>
- <jrn>House, M., Farley, K.A., and Stockli, D., 2000, Helium chronometry of apatite and titanite using Nd-YAG laser heating: *Earth and Planetary Science Letters*, v. 183, no. 3–4, p. 365–368, doi: 10.1016/S0012-821X(00)00286-7.</jrn>

TABLE DR 1. APATITE (U-Th)/He DATA FROM THE EASTERN RIFT FLANK.  
ONLY AGES THAT REPLICATE WITHIN ERROR LIMITS WERE USED AS A BASIS FOR THERMAL HISTORY MODELLING

| Sample no. | Location           | Elevation (m) | No of grains | <sup>4</sup> He (ncc) | Mass (mg)     | U (ppm) | Th (ppm) | Sm (ppm) | Th/U | Raw age (Ma) | <sup>a</sup> F <sub>T</sub> factor | Corrected age (Ma) | Error ± 1σ |
|------------|--------------------|---------------|--------------|-----------------------|---------------|---------|----------|----------|------|--------------|------------------------------------|--------------------|------------|
| 89Ky-15    | Mathews Range      | 1140          | 8            | 1.530                 | 0.0367        | 5.6     | 6.8      | n.a.     | 1.25 | 48.0         | 0.74                               | <b>64.6</b>        | 4.0        |
|            |                    |               | 8            | 0.601                 | 0.0132        | 6.8     | 8.0      | n.a.     | 1.22 | 43.5         | 0.64                               | <b>68.2</b>        | 4.2        |
| 89Ky-05    | Kipsing Gap        | 1240          | 8            | 2.868                 | 0.0471        | 7.5     | 8.4      | n.a.     | 1.15 | 53.2         | 0.79                               | <b>67.5</b>        | 4.2        |
|            |                    |               | 7            | 2.201                 | 0.0524        | 5.1     | 5.6      | n.a.     | 1.13 | 54.3         | 0.79                               | <b>68.4</b>        | 4.2        |
| 89Ky-09    | Lolokwe            | 1560          | 2            | 2.339                 | 0.0216        | 13.1    | 11.8     | 153.7    | 0.90 | 55.0         | 0.80                               | <b>68.8</b>        | 4.3        |
|            |                    |               | 2            | 0.576                 | 0.0106        | 8.0     | 7.0      | 114.1    | 0.87 | 45.6         | 0.75                               | <b>61.2</b>        | 3.8        |
|            |                    |               | 1            | 0.630                 | 0.0034        | 25.5    | 23.0     | 249.3    | 0.90 | 48.2         | 0.71                               | <b>67.8</b>        | 4.2        |
| 89Ky-07    | Lolokwe            | 1760          | 8            | 1.011                 | 0.0205        | 5.1     | 10.3     | n.a.     | 2.06 | 54.0         | 0.71                               | <b>76.1</b>        | 4.7        |
| 89Ky-41    | Karisia Hills      | 1900          | 2            | 0.542                 | 0.0048        | 17.2    | 1.3      | 12.0     | 0.07 | 52.5         | 0.70                               | <b>75.3</b>        | 4.7        |
| 89Ky-49    | Karisia Hills      | 1225          | 2            | 1.362                 | <b>0.0107</b> | 20.1    | 3.8      | n.a.     | 0.20 | 50.3         | 0.78                               | <b>64.9</b>        | 4.0        |
|            |                    |               | 2            | 5.729                 | <b>0.0220</b> | 35.9    | 11.9     | n.a.     | 0.34 | 55.8         | 0.82                               | <b>67.7</b>        | 4.2        |
|            |                    |               | 7            | 1.974                 | 0.0153        | 23.1    | 5.9      | n.a.     | 0.27 | 43.8         | 0.69                               | <b>63.4</b>        | 3.9        |
|            |                    |               | 7            | 2.417                 | 0.0218        | 23.0    | 9.6      | n.a.     | 0.43 | 36.5         | 0.72                               | <b>50.8</b>        | 3.2        |
| 89Ky-48    | Karisia Hills      | 1200          | 1            | 0.083                 | 0.0022        | 5.5     | 4.0      | 24.8     | 0.73 | 48.9         | 0.66                               | <b>73.8</b>        | 4.6        |
| 89Ky-35    | Karisia Hills      | 1100          | 2            | 0.312                 | <b>0.0074</b> | 4.2     | 15.0     | n.a.     | 3.67 | 45.0         | 0.71                               | <b>63.7</b>        | 4.0        |
|            |                    |               | 8            | 0.719                 | 0.0162        | 5.9     | 13.4     | n.a.     | 2.33 | 40.4         | 0.66                               | <b>61.1</b>        | 3.8        |
| 91Ky-77    | Nyiru Range        | 935           | 7            | 0.495                 | <b>0.0278</b> | 3.0     | 0.6      | n.a.     | 0.20 | 47.6         | 0.74                               | <b>64.1</b>        | 4.0        |
|            |                    |               | 8            | 0.325                 | 0.0201        | 3.3     | 1.1      | n.a.     | 0.36 | 38.2         | 0.70                               | <b>54.6</b>        | 3.4        |
|            |                    |               | 1            | 0.234                 | 0.0144        | 2.8     | 0.8      | 2.9      | 0.29 | 43.8         | 0.76                               | <b>57.4</b>        | 3.6        |
| 91Ky-76    | Ndoto Mountains    | 810           | 8            | 1.355                 | 0.0989        | 3.2     | 0.9      | n.a.     | 0.31 | 33.7         | 0.83                               | <b>40.8</b>        | 2.5        |
|            |                    |               | 8            | 0.520                 | 0.0544        | 2.4     | 0.2      | n.a.     | 0.10 | 32.0         | 0.80                               | <b>40.1</b>        | 2.5        |
| 91Ky-75    | Ndoto Mountains    | 810           | 7            | 0.417                 | <b>0.0608</b> | 2.1     | 0.1      | n.a.     | 0.04 | 26.4         | 0.82                               | <b>32.2</b>        | 2.0        |
|            |                    |               | 8            | 0.233                 | 0.0409        | 1.6     | 0.2      | n.a.     | 0.14 | 28.5         | 0.78                               | <b>36.7</b>        | 2.3        |
| 91Ky-44    | E of Mathews Range | 765           | 8            | 0.899                 | <b>0.0468</b> | 3.2     | 2.7      | n.a.     | 0.88 | 41.3         | 0.78                               | <b>53.2</b>        | 3.3        |
|            |                    |               | 12           | 0.655                 | 0.0490        | 2.7     | 2.5      | n.a.     | 0.98 | 33.7         | 0.75                               | <b>45.3</b>        | 2.8        |
|            |                    |               | 11           | 0.612                 | 0.0340        | 5.7     | 5.1      | n.a.     | 0.93 | 21.7         | 0.75                               | <b>29.1</b>        | 1.8        |
|            |                    |               | 2            | 0.141                 | 0.0155        | 1.5     | 1.7      | 9.2      | 1.12 | 38.4         | 0.79                               | <b>48.3</b>        | 3.0        |
|            |                    |               | 2            | 0.152                 | 0.0123        | 1.9     | 1.2      | 9.4      | 0.63 | 45.9         | 0.76                               | <b>60.0</b>        | 3.7        |
|            |                    |               | 2            | 0.241                 | 0.0086        | 4.2     | 3.8      | 20.6     | 0.91 | 44.7         | 0.75                               | <b>59.6</b>        | 3.7        |
|            |                    |               | 2            | 0.107                 | 0.0142        | 1.8     | 1.9      | 12.2     | 1.03 | 27.5         | 0.78                               | <b>35.1</b>        | 2.2        |
|            |                    |               | 1            | 0.108                 | 0.0144        | 1.3     | 1.3      | 8.5      | 0.99 | 37.0         | 0.78                               | <b>47.8</b>        | 3.0        |
|            |                    |               | 1            | 0.171                 | 0.0123        | 2.5     | 2.0      | 11.9     | 0.79 | 38.1         | 0.77                               | <b>49.6</b>        | 3.1        |

<sup>a</sup>F<sub>T</sub> is the α-ejection correction after Farley et al. (1996).

TABLE DR 2. APATITE (U-Th)/He DATA FROM THE WESTERN RIFT FLANK.  
ONLY AGES THAT REPLICATE WITHIN ERROR LIMITS WERE USED AS A BASIS FOR THERMAL HISTORY MODELLING

| Sample no. | Location         | Elevation (m) | No of grains | <sup>4</sup> He (ncc) | Mass (mg) | U (ppm) | Th (ppm) | Sm (ppm) | Th/U | Raw age (Ma) | <sup>a</sup> F <sub>T</sub> factor | Corrected age (Ma) | Error ± 1σ |
|------------|------------------|---------------|--------------|-----------------------|-----------|---------|----------|----------|------|--------------|------------------------------------|--------------------|------------|
| 89Ky-65    | Cherangani Hills | 1770          | 2            | 0.303                 | 0.0103    | 6.4     | 20.7     | 38.2     | 3.22 | 21.3         | 0.74                               | <b>28.9</b>        | 1.8        |
|            |                  |               | 2            | 0.975                 | 0.0270    | 7.9     | 19.8     | 38.2     | 2.50 | 23.5         | 0.82                               | <b>28.8</b>        | 1.8        |
| 89Ky-62    | Cherangani Hills | 1390          | 2            | 0.636                 | 0.0109    | 14.9    | 36.3     | 34.3     | 2.44 | 20.4         | 0.74                               | <b>27.5</b>        | 1.7        |
|            |                  |               | 1            | 0.079                 | 0.0013    | 19.0    | 54.2     | 57.9     | 2.85 | 15.8         | 0.62                               | <b>25.4</b>        | 1.6        |
| 89Ky-61    | Cherangani Hills | 1290          | 1            | 0.257                 | 0.0065    | 10.7    | 31.3     | 23.7     | 2.92 | 18.0         | 0.76                               | <b>23.8</b>        | 1.5        |
|            |                  |               | 2            | 0.995                 | 0.0118    | 22.4    | 54.9     | 72.4     | 2.45 | 19.6         | 0.76                               | <b>25.8</b>        | 1.6        |
|            |                  |               | 2            | 0.745                 | 0.0120    | 16.2    | 20.4     | 32.7     | 1.26 | 24.3         | 0.75                               | <b>32.2</b>        | 2.0        |
|            |                  |               | 1            | 0.481                 | 0.0065    | 15.8    | 40.7     | 35.2     | 2.57 | 24.0         | 0.76                               | <b>31.6</b>        | 2.0        |
|            |                  |               | 1            | 0.318                 | 0.0035    | 20.8    | 44.8     | 69.0     | 2.15 | 24.0         | 0.73                               | <b>32.9</b>        | 2.0        |
| 89Ky-60    | Cherangani Hills | 1175          | 1            | 0.490                 | 0.0064    | 32.8    | 50.4     | 32.0     | 1.54 | 14.2         | 0.76                               | <b>18.6</b>        | 1.2        |
|            |                  |               | 1            | 0.245                 | 0.0045    | 24.2    | 56.8     | 39.0     | 2.34 | 11.9         | 0.73                               | <b>16.2</b>        | 1.0        |
|            |                  |               | 1            | 0.739                 | 0.0552    | 34.7    | 56.7     | 48.2     | 1.64 | 22.9         | 0.74                               | <b>30.8</b>        | 1.9        |
|            |                  |               | 1            | 0.164                 | 0.0034    | 31.7    | 56.1     | 48.2     | 1.77 | 8.1          | 0.73                               | <b>11.1</b>        | 0.7        |
|            |                  |               | 1            | 0.460                 | 0.0057    | 23.5    | 42.1     | 41.1     | 1.79 | 21.0         | 0.75                               | <b>28.0</b>        | 1.7        |
|            |                  |               | 1            | 0.304                 | 0.0083    | 22.0    | 32.2     | 26.7     | 1.46 | 10.2         | 0.78                               | <b>13.1</b>        | 0.8        |
|            |                  |               | 1            | 1.123                 | 0.0148    | 20.8    | 28.3     | 25.2     | 1.36 | 22.7         | 0.82                               | <b>27.5</b>        | 1.7        |

<sup>a</sup>F<sub>T</sub> is the α-ejection correction after Farley et al. (1996).

TABLE DR 3. APATITE (U-Th)/He MODEL DATA WITH INPUT PARAMETERS, MODELLED PREDICTED AGES AND UNCORRECTED OBSERVED AGES

| Sample name | Average grain radius ( $\mu\text{m}$ ) | Average grain length ( $\mu\text{m}$ ) | Sphere radius ( $\mu\text{m}$ ) | Predicted age (Ma) | Observed age (Ma) |
|-------------|----------------------------------------|----------------------------------------|---------------------------------|--------------------|-------------------|
| 89Ky-15     | 58                                     | 180                                    | 72                              | 48                 | 48                |
|             | 44                                     | 115                                    | 53                              | 43                 | 44                |
| 89Ky-05     | 70                                     | 189                                    | 84                              | 52                 | 53                |
|             | 73                                     | 169                                    | 85                              | 53                 | 54                |
| 89Ky-07     | 54                                     | 131                                    | 64                              | 53                 | 54                |
| 89KY-35     | 45                                     | 133                                    | 56                              | 44                 | 44                |
|             | 49                                     | 151                                    | 60                              | 45                 | 45                |
| 89KY-49     | 49                                     | 148                                    | 60                              | 46                 | 44                |
|             | 64                                     | 164                                    | 77                              | 50                 | 50                |
|             | 84                                     | 244                                    | 103                             | 54                 | 56                |
| 91Ky-76     | 85                                     | 209                                    | 100                             | 34                 | 34                |
|             | 70                                     | 196                                    | 85                              | 31                 | 32                |
| 91KY-75     | 69                                     | 147                                    | 80                              | 30                 | 29                |
|             | 76                                     | 200                                    | 90                              | 32                 | 26                |
| 89-KY-61    | 64                                     | 182                                    | 77                              | 23                 | 20                |
|             | 54                                     | 199                                    | 68                              | 21                 | 24                |
| 89-KY-65    | 56                                     | 164                                    | 68                              | 20                 | 21                |
|             | 80                                     | 208                                    | 96                              | 26                 | 24                |
